# Supplementary material for: Cytotoxic, Anti-Migration, and Anti-Invasion Activities on Breast Cancer Cells of Angucycline Glycosides Isolated from a Marine-Derived Streptomyces sp
Source: PubMed Central journal article supplement (PMC6562490; doi:10.3390/md17050277), 2019-05-09

# Supplementary Materials

## Cytotoxic, Anti-Migration and Anti-Invasion Activities on Breast Cancer Cells of Angucycline Glycosides Isolated from a Marine-Derived *Streptomyces* sp.

Xin-Ying Qu<sup>1,‡</sup>, Jin-Wei Ren<sup>2,‡</sup>, Ai-Hong Peng<sup>1,2,‡</sup>, Shi-Qi Lin<sup>1</sup>, Dan-Dan Lu<sup>1,2</sup>, Qian-Qian Du<sup>1,2</sup>, Ling Liu<sup>2</sup>, Xia Li<sup>1</sup>, Er-Wei Li<sup>2,\*</sup> and Wei-Dong Xie<sup>1,\*</sup>

<sup>1</sup> College of Marine Science, Shandong University at Weihai, Weihai 264209, China; quxinying321@163.com (X-Y.Q.); pengahsdu@163.com (A-H.P.); lsqsd@outlook.com (S-Q.L.); 18304019094@163.com (D-D.L.); 15536791677@163.com (Q-Q.D.); xiali@sdu.edu.cn (X.L.)

<sup>2</sup> State Key Laboratory of Mycology, Institute of Microbiology, Chinese Academy of Sciences, Beijing 100101, China; renjw@im.ac.cn (J-W.R.); liul@im.ac.cn (L.L.)

<sup>‡</sup> These authors contributed equally to this paper.

<sup>\*</sup> Correspondence: liew@im.ac.cn (E-W.L.); wdxie@sdu.edu.cn (W-D.X.); Tel.: +86-10-6480-6141 (E-W.L.); +86-631-568-8303 (W-D.X.)

**Keywords:** *Streptomyces*; angucycline; saquayamycin; vineomycin; cytotoxicity; migration; breast cancer cell; MDA-MB-231

## Contents

**Figure S1.** (A) Colony morphology of *Streptomyces* sp. OC1610.4. (B) 16S rRNA gene sequence of *Streptomyces* sp. OC1610.4 (GenBank number: MK045847). (C) Neighbor-joining phylogenetic tree based on 16S rRNA gene sequences of *Streptomyces* sp. OC1610.4.

**Figure S2.** HR-ESI-MS of **1**.

**Figure S3.**  $^1\text{H}$ -NMR spectrum (500 MHz,  $\text{CD}_3\text{OD}$ ) of **1**.

**Figure S4.**  $^{13}\text{C}$ -NMR spectrum (125 MHz,  $\text{CD}_3\text{OD}$ ) of **1**.

**Figure S5.** HMQC spectrum (500 MHz,  $\text{CD}_3\text{OD}$ ) of **1**.

**Figure S6.** HMBC spectrum (500 MHz,  $\text{CD}_3\text{OD}$ ) of **1**.

**Figure S7.**  $^1\text{H}$ - $^1\text{H}$  COSY spectrum (500 MHz,  $\text{CD}_3\text{OD}$ ) of **1**.

**Figure S8.** NOESY spectrum (500 MHz,  $\text{CD}_3\text{OD}$ ) of **1**.

**Figure S9.** HR-ESI-MS of **2**.

**Figure S10.**  $^1\text{H}$ -NMR spectrum (500 MHz, acetone- $\text{d}_6$ ) of **2**.

**Figure S11.**  $^{13}\text{C}$ -NMR spectrum (125 MHz, acetone- $\text{d}_6$ ) of **2**.

**Figure S12.** HMQC spectrum (500 MHz, acetone- $\text{d}_6$ ) of **2**.

**Figure S13.** HMBC spectrum (500 MHz, acetone- $\text{d}_6$ ) of **2**.

**Figure S14.**  $^1\text{H}$ - $^1\text{H}$  COSY spectrum (500 MHz, acetone- $\text{d}_6$ ) of **2**.

**Figure S15.** NOESY spectrum (500 MHz, acetone- $\text{d}_6$ ) of **2**.

**Figure S1.** (A) Colony morphology of *Streptomyces* sp. OC1610.4. (B) 16S rRNA gene sequence of *Streptomyces* sp. OC1610.4 (GenBank number: MK045847). (C) Neighbor-joining phylogenetic tree based on 16S rRNA gene sequences of *Streptomyces* sp. OC1610.4.

**A.**

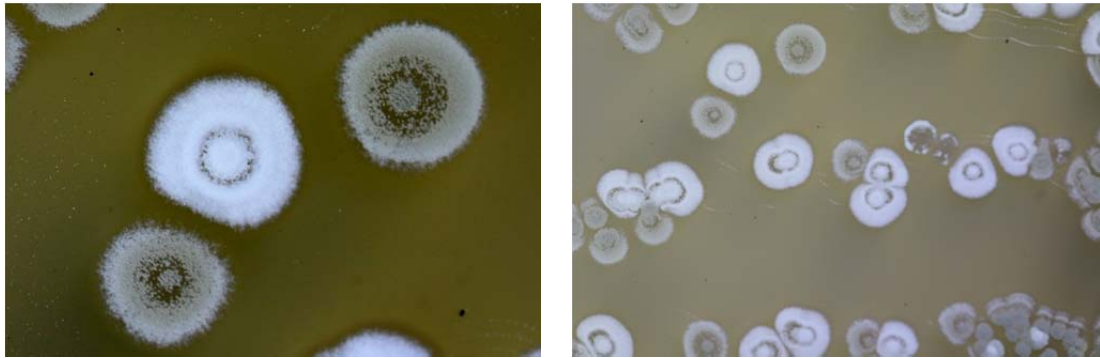

**B.**

```

GTGCAGTCGGGTCTTACCATGCAGTCGACGATGAAGCCCTTCGGGGTGGATTAGTGG
CGAACGGGTGAGTAACACGTGGGCAATCTGCCCTGCACTCTGGGACAAGCCCTGGAA
ACGGGGTCTAATACCGGATACGAGCCTCCCGGGCATCTGGGAGGTTGGAAAGCTCCG
GCGGTGCAGGATGAGCCCGCGGCCTATCAGCTTGTTGGTGAGGTAACGGCTCACCAA
GGCGACGACGGGTAGCCGGCCTGAGAGGGCGACCGGCCACACTGGGACTGAGACAC
GGCCCAGACTCCTACGGGAGGCAGCAGTGGGGAATATTGCACAATGGGCGAAAGCCT
GATGCAGCGACGCCGCGTGAGGGATGACGGCCTTCGGGTTGTAAACCTCTTTCAGCA
GGGAAGAAGCGAAAGTGACGGTACCTGCAGAAGAAGCGCCGGCTAACTACGTGCCA
GCAGCCGCGGTAATACGTAGGGCGCAAGCGTTGTCCGGAATTATTGGGCGTAAAGAG
CTCGTAGGCGGCTTGTCGCGTCGATTGTGAAAGCCCGGGGCTTAACTCCGGGTCTGCA
GTCGATACGGGCAGGCTAGAGTGTGGTAGGGGAGATCGGAATCCTGGTGTAGCGGT
GAAATGCGCAGATATCAGGAGGAACACCGGTGGCGAAGGCGGATCTCTGGGCCATTA
CTGACGCTGAGGAGCGAAAGCGTGGGGAGCGAACAGGATTAGATACCCTGGTAGTCC
ACGCCGTAAACGGTGGGCACTATGTGTTGGCGACATTCCACGTCGTCGGTGCCGCAG
CTAACGCATTAAGAGCCCCGCCTGGGGGAGTACGGCCGCAACGCTGATACTCAAAG
AATTGATGGGGGCGCGCACAAGCAGCGGAGCATGTGGCTTATTTGACGCAACGCGC
AGAACTTACCGAGGCTTGACATACACCAGTAACATCCAGACATGAGTGCCCCCTCC
TGGTCGGGGTACAGTAGTGCATGGGCTTGTCGTCAACTCAGTCGTGACATGTTGAGG
AGAAACCCCCCAGCACATCAGA
    
```

C.

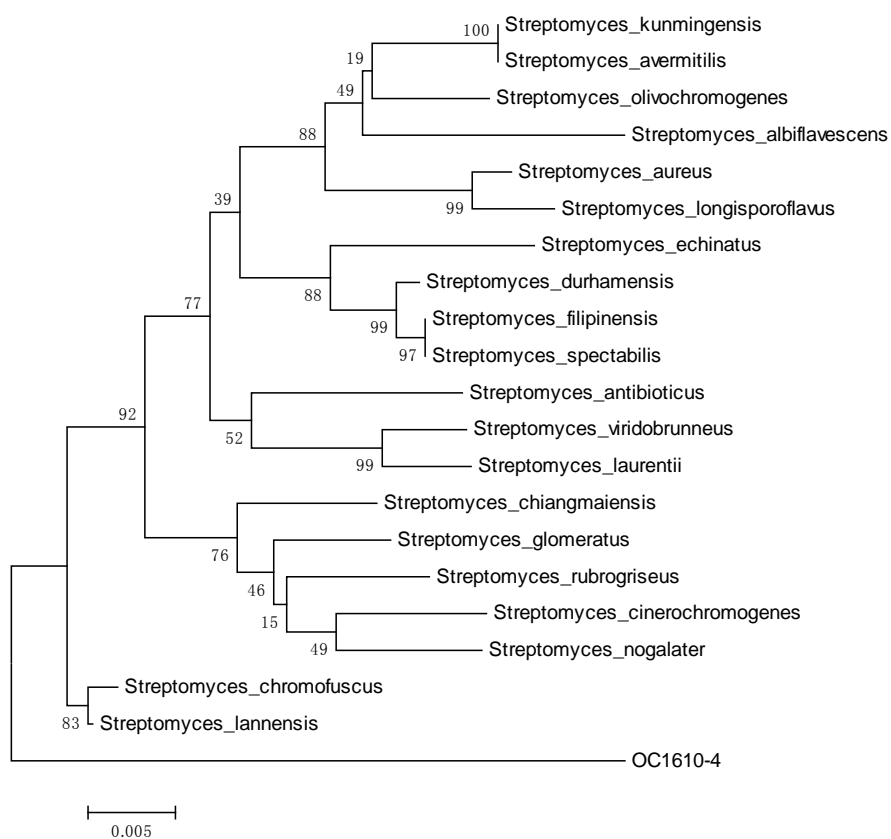

Figure S2. HR-ESI-MS of 1.

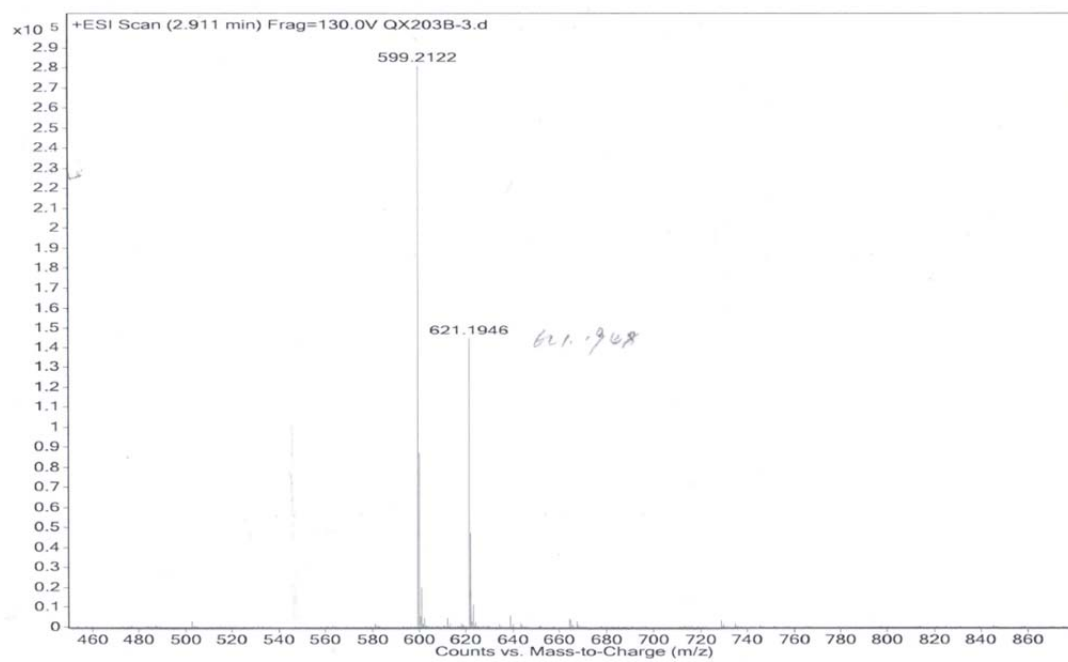

**Figure S3.**  $^1\text{H-NMR}$  spectrum (500 MHz,  $\text{CD}_3\text{OD}$ ) of **1**.

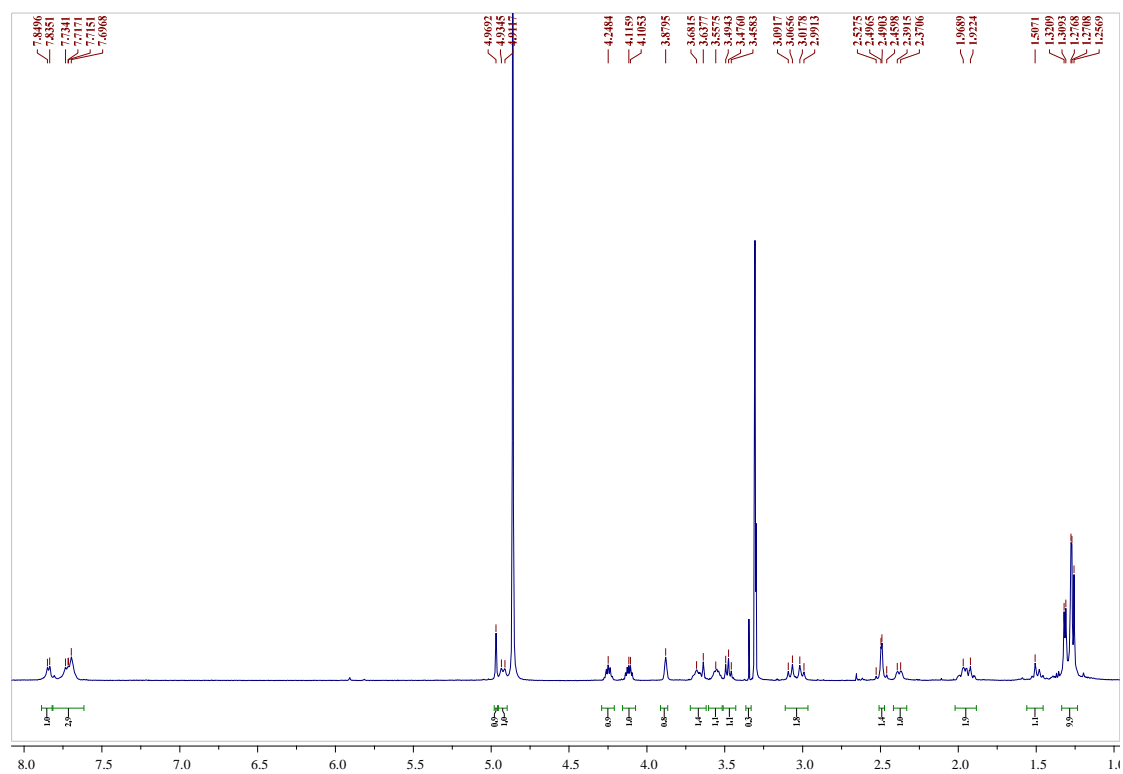

**Figure S4.**  $^{13}\text{C-NMR}$  spectrum (125 MHz,  $\text{CD}_3\text{OD}$ ) of **1**.

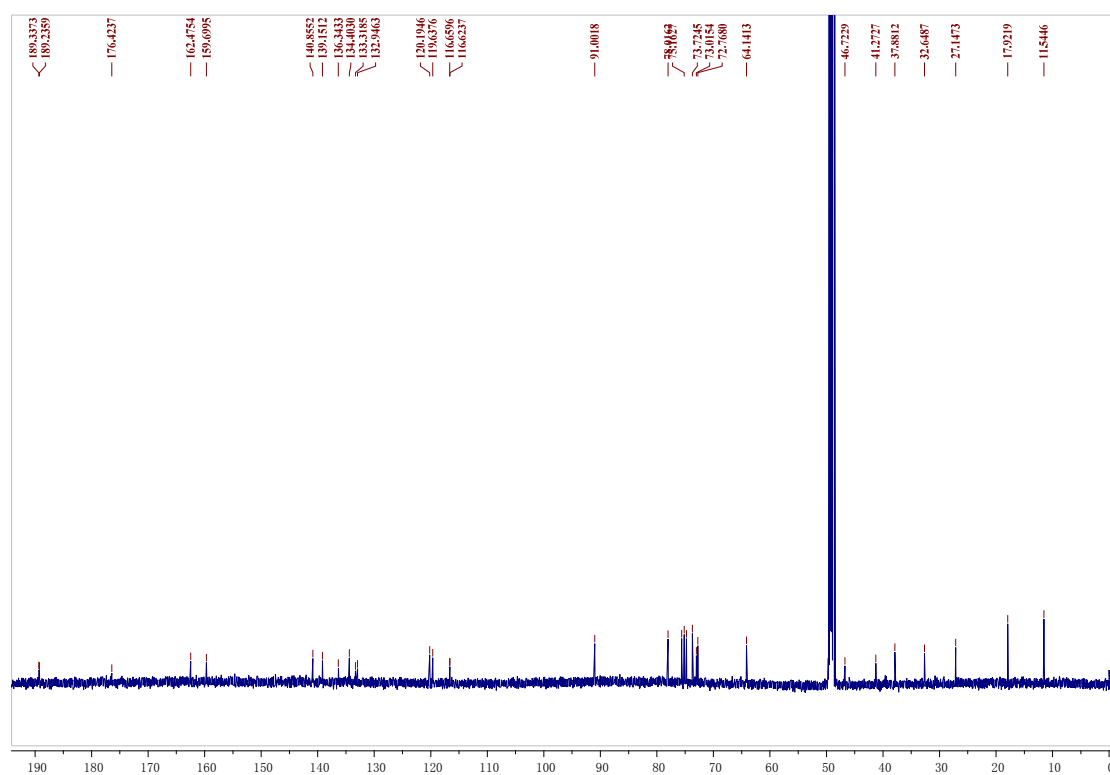

**Figure S5.** HMQC spectrum (500 MHz, CD<sub>3</sub>OD) of **1**.

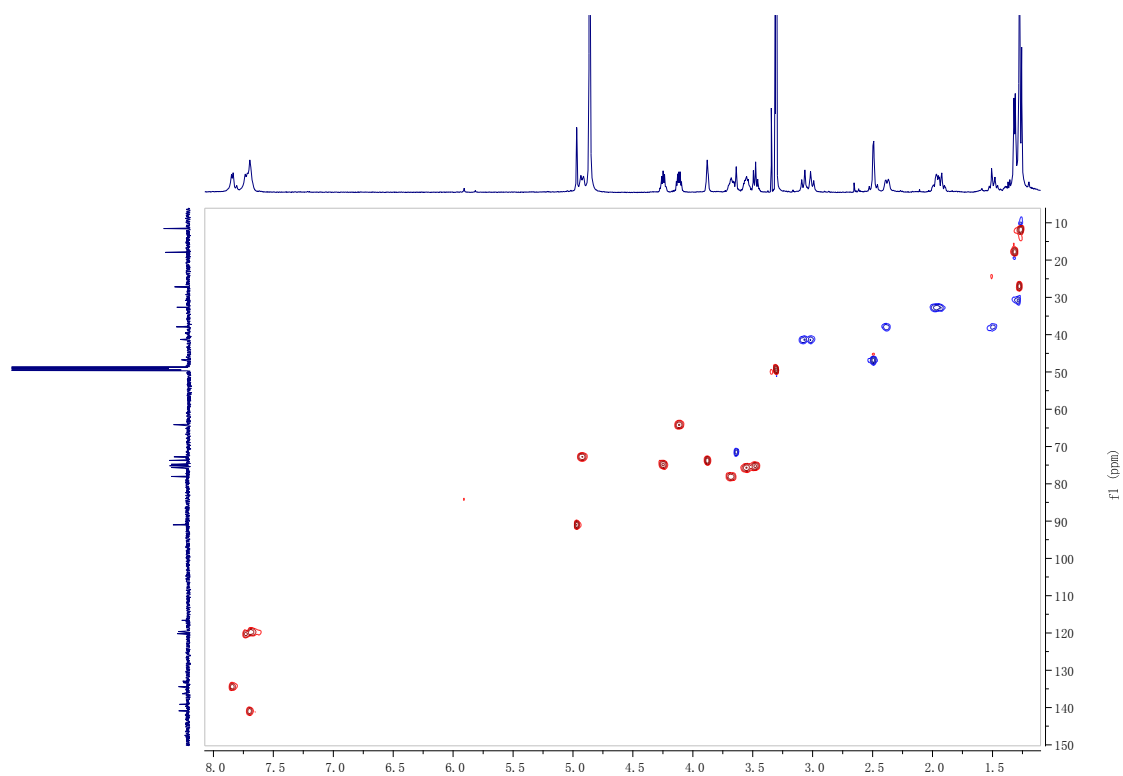

**Figure S6.** HMBC spectrum (500 MHz, CD<sub>3</sub>OD) of **1**.

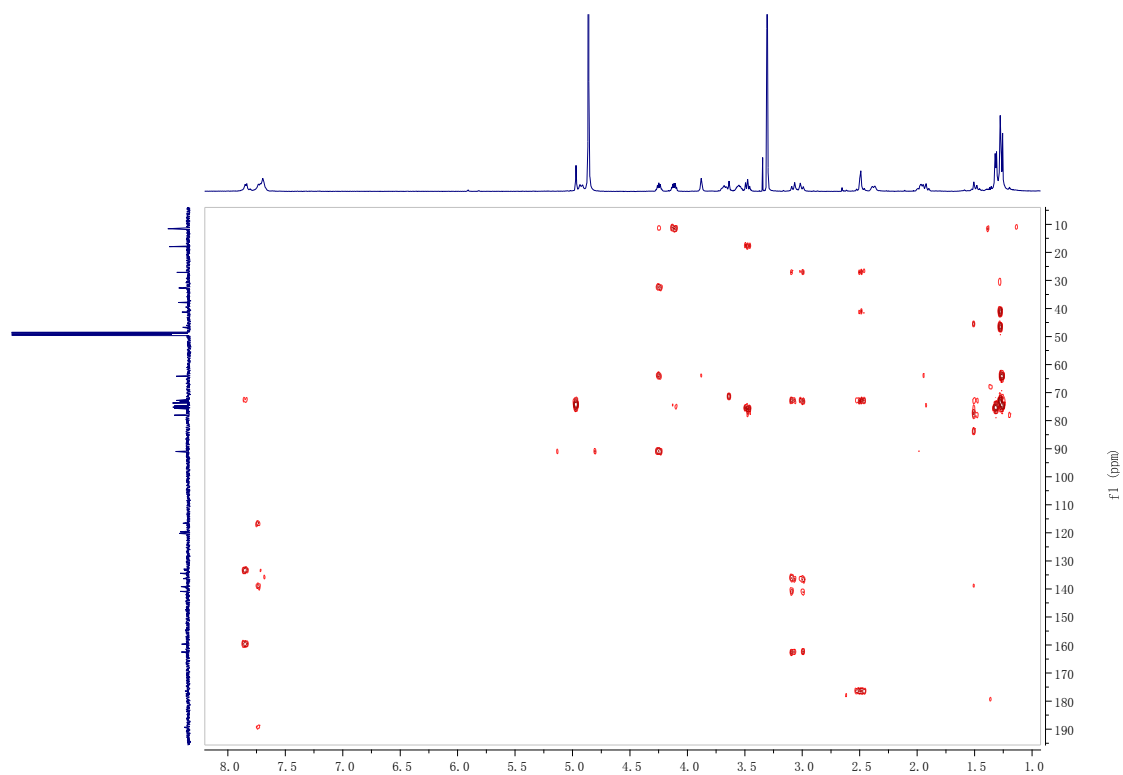

**Figure S7.**  $^1\text{H}$ - $^1\text{H}$  COSY spectrum (500 MHz,  $\text{CD}_3\text{OD}$ ) of **1**.

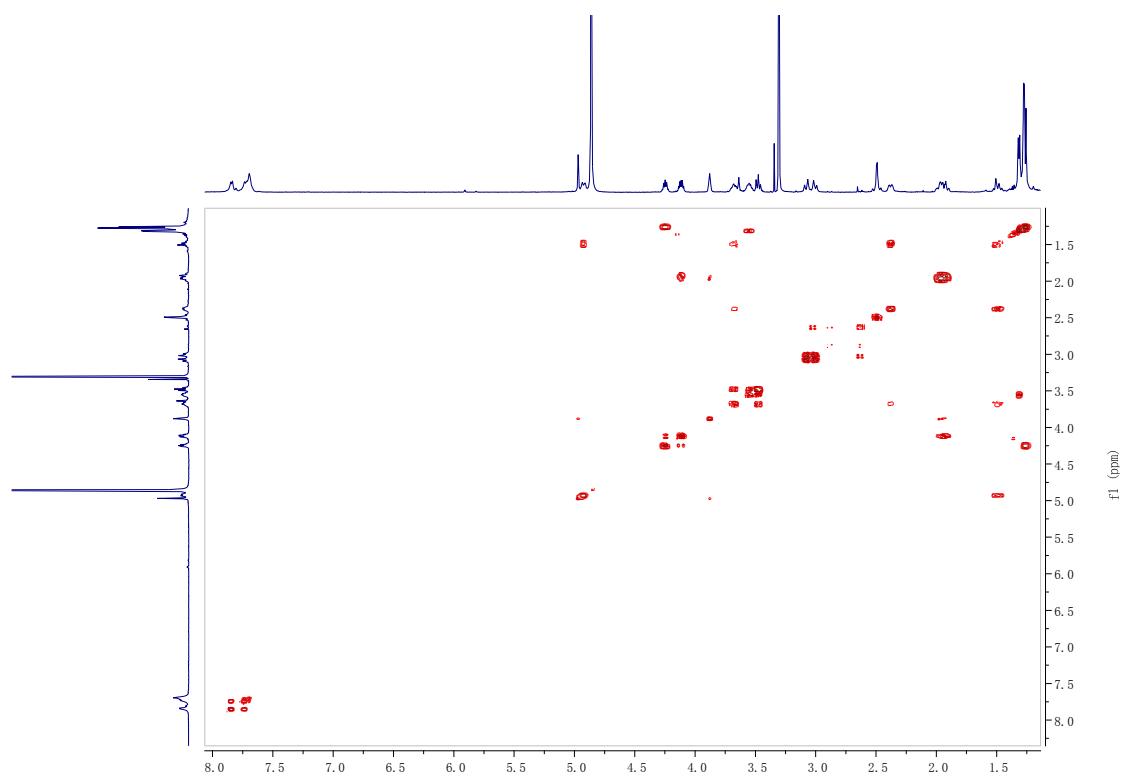

**Figure S8.** NOESY spectrum (500 MHz,  $\text{CD}_3\text{OD}$ ) of **1**.

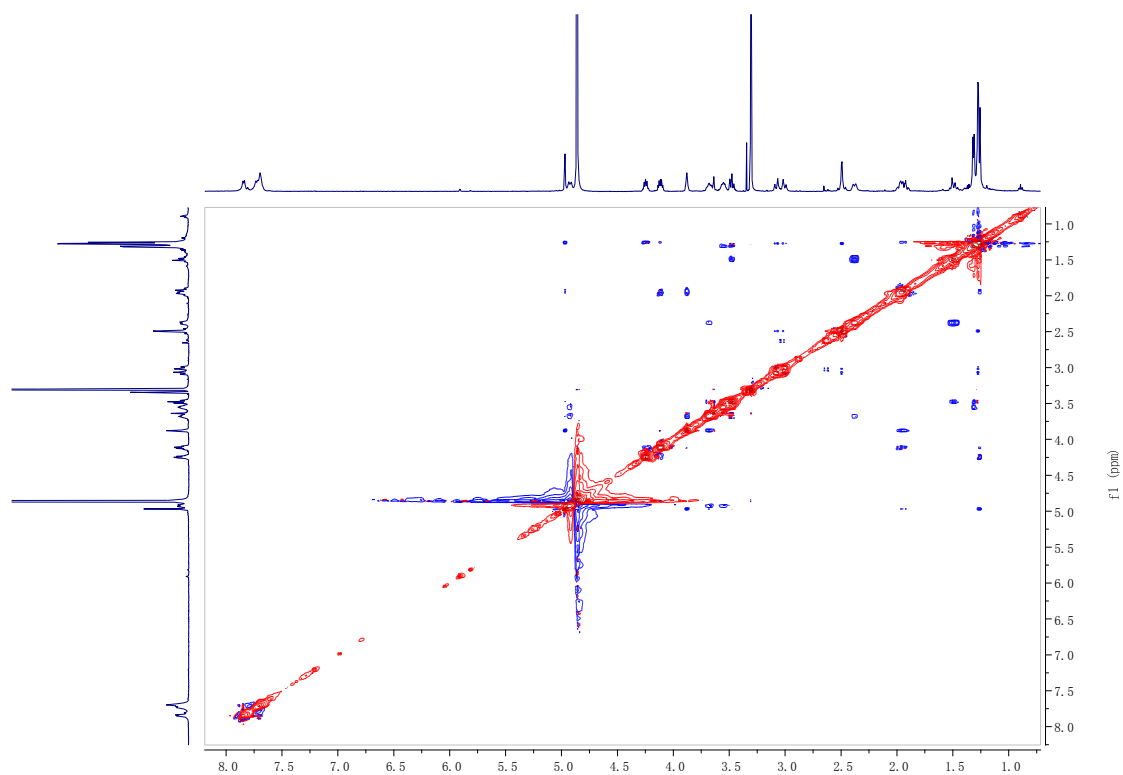





**Figure S11.**  $^{13}\text{C}$ -NMR spectrum (125 MHz, acetone- $\text{d}_6$ ) of **2**.

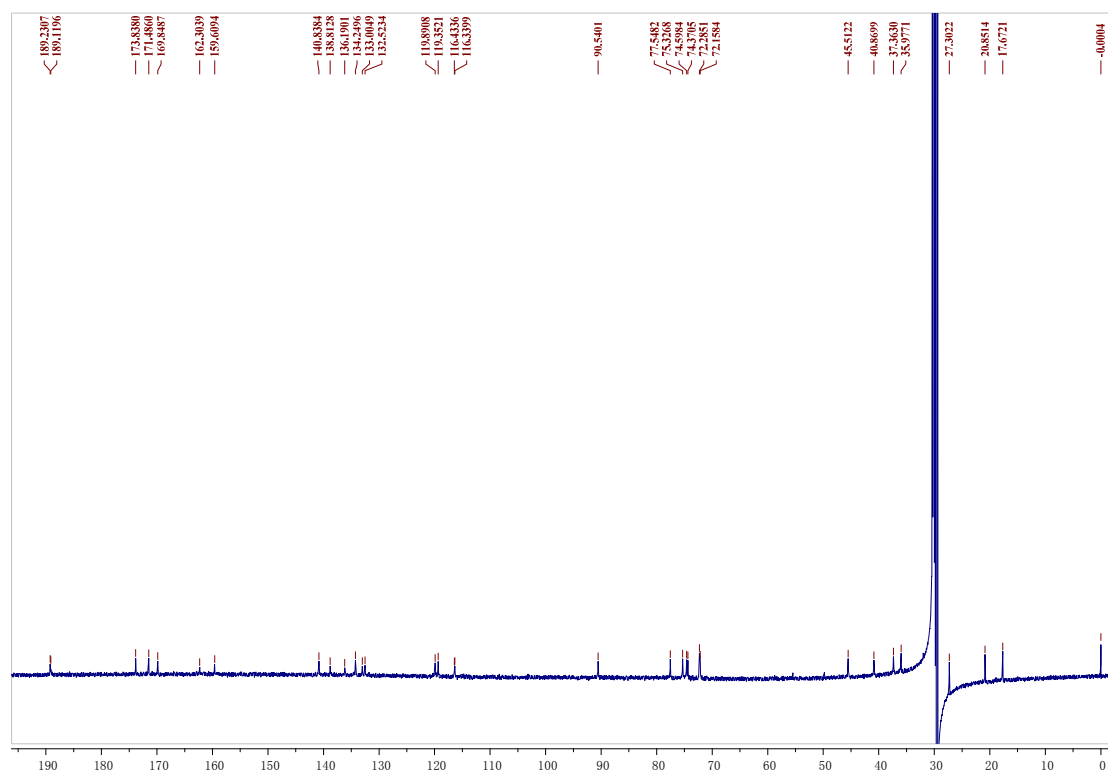

**Figure S12.** HMQC spectrum (500 MHz, acetone- $\text{d}_6$ ) of **2**.

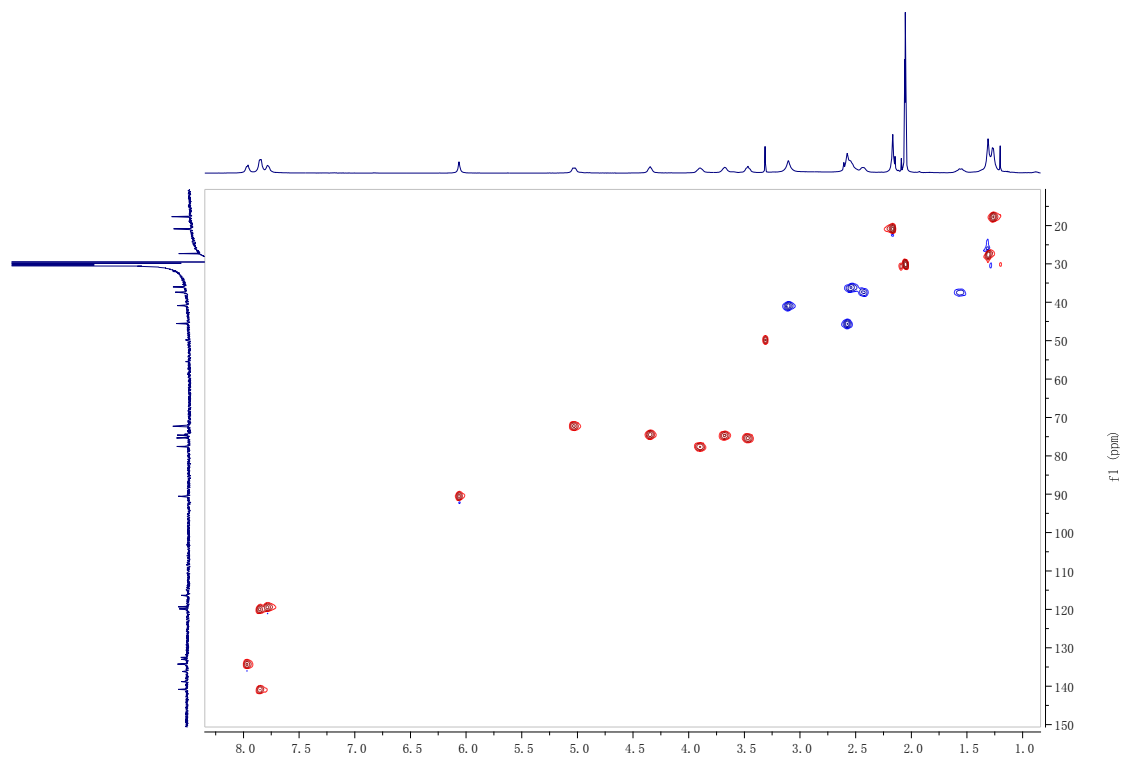

**Figure S13.** HMBC spectrum (500 MHz, acetone-d<sub>6</sub>) of **2**.

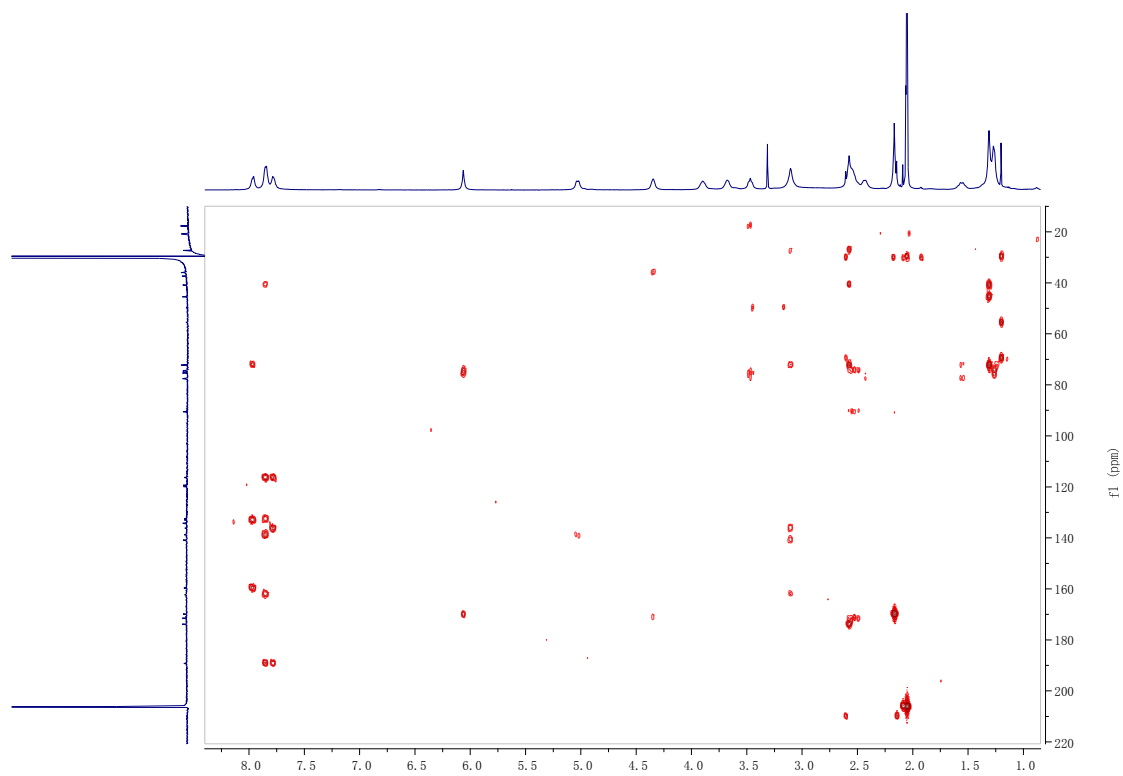

**Figure S14.** <sup>1</sup>H-<sup>1</sup>H COSY spectrum (500 MHz, acetone-d<sub>6</sub>) of **2**.

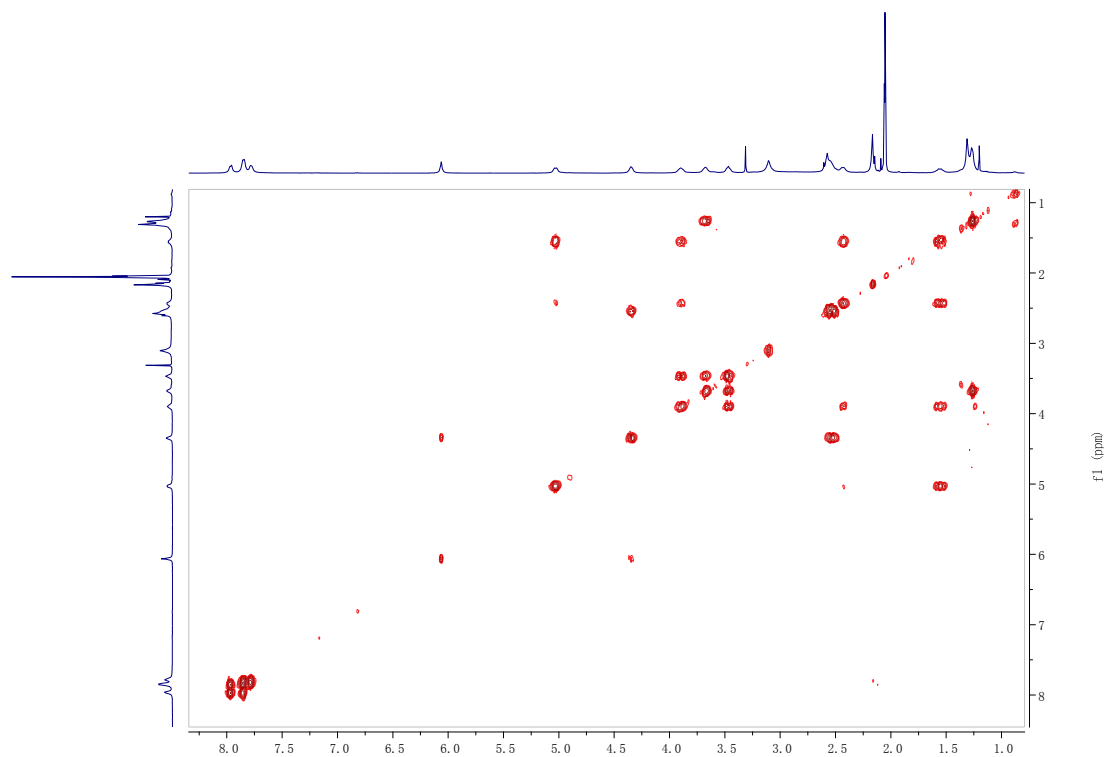

**Figure S15.** NOESY spectrum (500 MHz, acetone- $d_6$ ) of **2**.

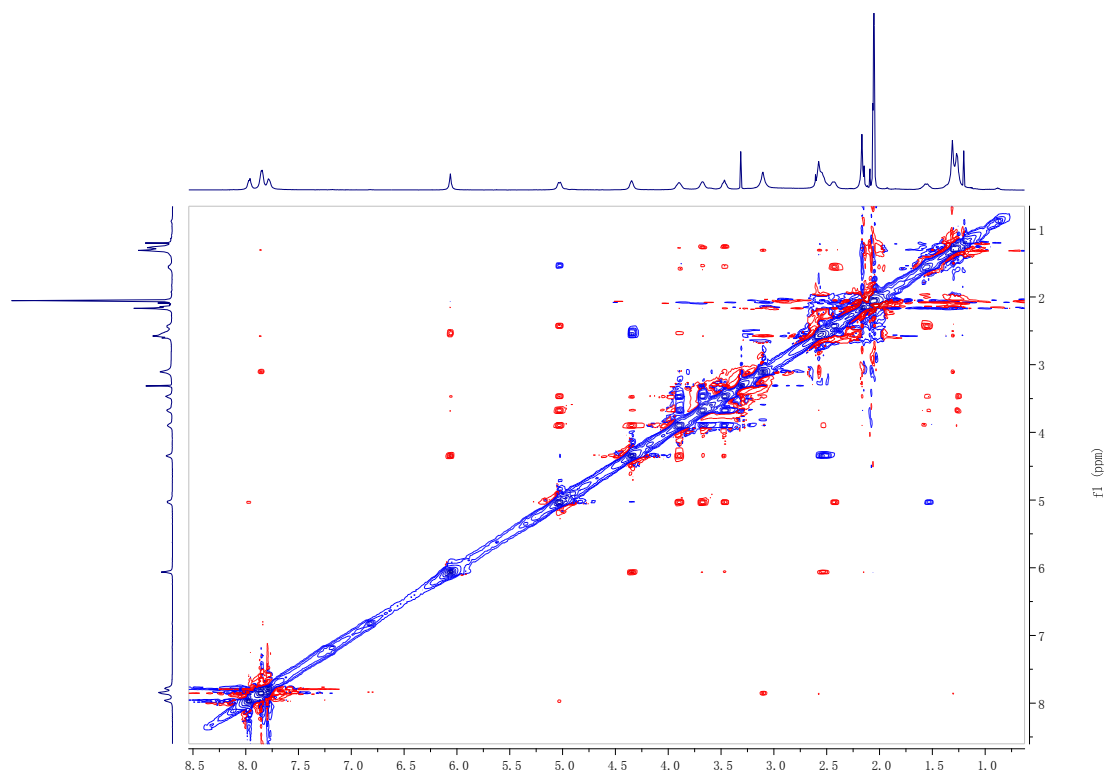

Supplement: marinedrugs-17-00277-s001.pdf [file marinedrugs-17-00277-s001.pdf]
